# Supplementary material for: Syntheses, crystal structures and characterizations of two new quaternary thioborates: PbMBS4 (M = Sb, Bi)
Source: Royal Society of Chemistry journal article supplement (doi:10.1039/c0dt01751e), 2011-01-01
Supplement: c0dt01751e.pdf [file c0dt01751e.pdf]

## Syntheses, crystal structures and characterizations of two new quaternary thioborates: $\text{PbMBS}_4$ ( $\text{M} = \text{Sb, Bi}$ )<sup>†</sup>

Lei Geng,<sup>a,b</sup> Wen-Dan Cheng,<sup>\*a</sup> Wei-Long Zhang,<sup>a</sup> Ye-Yu Li,<sup>a,b</sup> Zhong-Zhen Luo,<sup>a,b</sup> Hao Zhang,<sup>a</sup> Chen-Sheng Lin,<sup>a</sup> and Zhang-Zhen He<sup>a</sup>

<sup>a</sup> State Key Laboratory of Structural Chemistry, Fujian Institute of Research on the Structure of Matter, Chinese Academy of Sciences, Fuzhou 350002, P. R. China

<sup>b</sup> Graduate School of the Chinese Academy of Sciences, Beijing, 100039, P. R. China

E-mail: [cwd@fjirsm.ac.cn](mailto:cwd@fjirsm.ac.cn)

### Electronic Supplementary Information

**Table S1** The definitions and related state energies (eV) of the special k-points for  $\text{PbSbBS}_4$ .

| k-point           | H-VB <sup>a</sup> | L-CB <sup>b</sup> |
|-------------------|-------------------|-------------------|
| G(0, 0, 0)        | -0.35784          | 2.023093          |
| Z(0, 0, 0.5)      | -0.36782          | 2.329496          |
| Y(0, 0.5, 0)      | -0.16087          | 2.26089           |
| A(-0.5, 0.5, 0)   | -0.07326          | 2.162252          |
| B(-0.5, 0, 0.0)   | -0.0129           | 2.161991          |
| D(-0.5, 0, 0.5)   | -0.16367          | 2.094257          |
| E(-0.5, 0.5, 0.5) | -0.09163          | 2.200215          |
| C(0, 0.5, 0.5)    | -0.07457          | 2.208432          |

<sup>a</sup>H-VB, the highest valence band; <sup>b</sup>L-CB, the lowest conduction band.

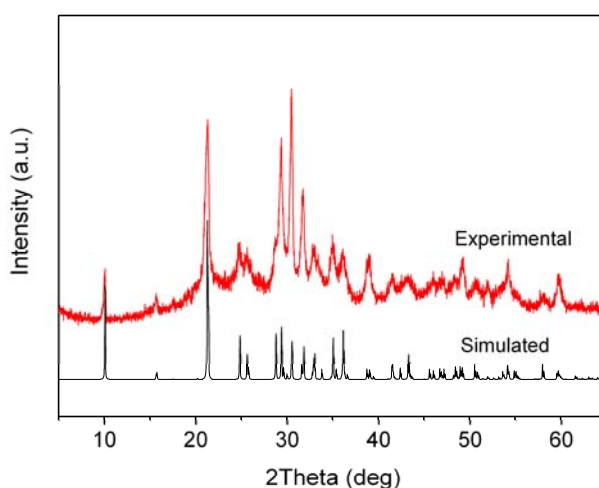

**Fig. S1** X-ray powder diffraction pattern for compound  $\text{PbSbBS}_4$ . The radiation wavelength of the X-ray is  $\lambda = 1.5418 \text{ \AA}$ .
